# Supplementary material
Source: publisher figshare collection journal article supplement (https://tandf.figshare.com/ndownloader/files/16250321)
Supplement: Supplementary file 1 [file 16250321]

**Appendix 1: Supplementary material**

**Table S1:** Proportion (%) of patients above reference values for proteins

|  | **Upper reference value** | **Primary** | **Secondary** | **Revision** | **P-Value** |
| --- | --- | --- | --- | --- | --- |
| C- reactive protein1 | 5.6 mg/L | 16.7 | 18.5 | 18.6 | 0.91 |
| Creatinine2 | 110 nmol/L (male)  90 nmol/L (female) | 8.3 | 7.8 | 1.5 | 0.28 |
| Albumin1 | 48 g/L | 6.2 | 5.2 | 9.7 | 0.49 |
| Total Protein – Plasma2 | 80 g/L | 2.5 | 5.2 | 1.6 | 0.26 |
| Total Protein - CSF 3 | 0.5g/L | 206 | 27.9 | 30.7 | 0.17 |

References

- Koerbin G, Cavanaugh JA, Potter JM, et al. ‘Aussie normals’: an a priori study to develop clinical chemistry reference intervals in a healthy Australian population. Pathology 2015; 47: 138–44.
- Tate JR, Sikaris KA, Jones GRD, et al. Adult and paediatric common reference intervals in Australia and New Zealand for a first panel of chemistry analytes. AACB Committee for Common Reference Intervals <https://www.aacb.asn.au/documents/item/3201>.
- Gray LD, Fedorko DP. Laboratory diagnosis of bacterial meningitis. Clin Microbiol Rev 1992; 5: 130–45.
